# Supplementary material for: Spatial heterogeneity in biofilm metabolism elicited by local control of phenazine methylation
Source: PubMed Central journal article supplement — Proc Natl Acad Sci U S A. 2023 Oct 17;120(43):e2313208120. doi: 10.1073/pnas.2313208120 (PMC10614215; doi:10.1073/pnas.2313208120), 2023-10-17
Supplement: pnas.2313208120.sapp.pdf [file pnas.2313208120.sapp.pdf]

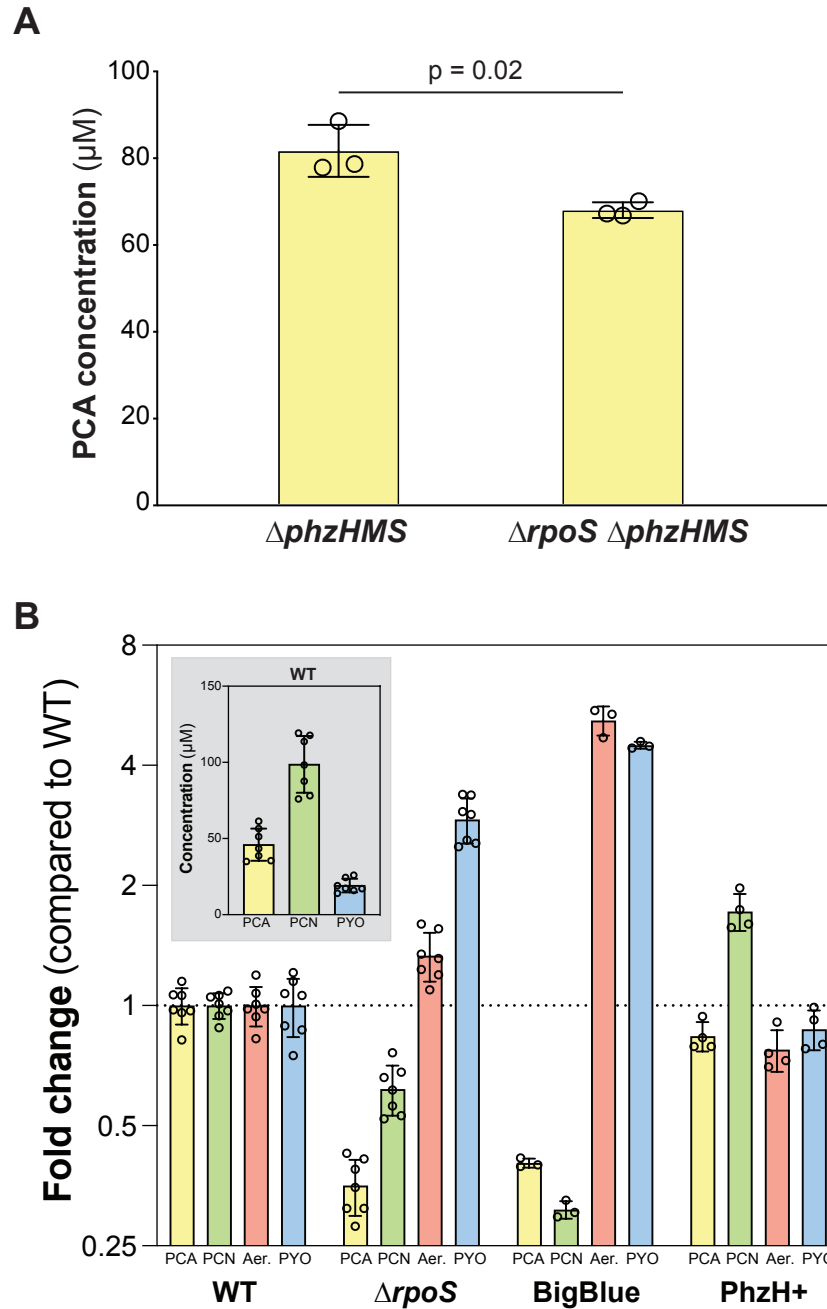

**Figure S1. Quantification of phenazines from PA14 colony biofilms. (A)** PCA produced by macrocolony biofilms of PA14 and  $\Delta\text{rpoS}$  strains lacking *phzH*, *phzM*, and *phzS* ( $\Delta\text{phzHMS}$ ). In these strains, the PCA production is indicative of the total amount of phenazines made due to the lack of the phenazine modification enzymes. Data points represent biological triplicates and error bars represent standard deviation. The  $p$  value was calculated using an unpaired, two-tailed  $t$ -test. **(B)** Change in phenazine production by  $\Delta\text{rpoS}$ , BigBlue, and PhzH+ biofilms relative to biofilms formed by WT PA14. Inset: absolute values of phenazines in a WT biofilm. Macrocolony biofilms were grown on 1% tryptone, 1% agar for 72 hours. Aer., aeruginosins. Individual points represent biological replicates and error bars represent standard deviation.

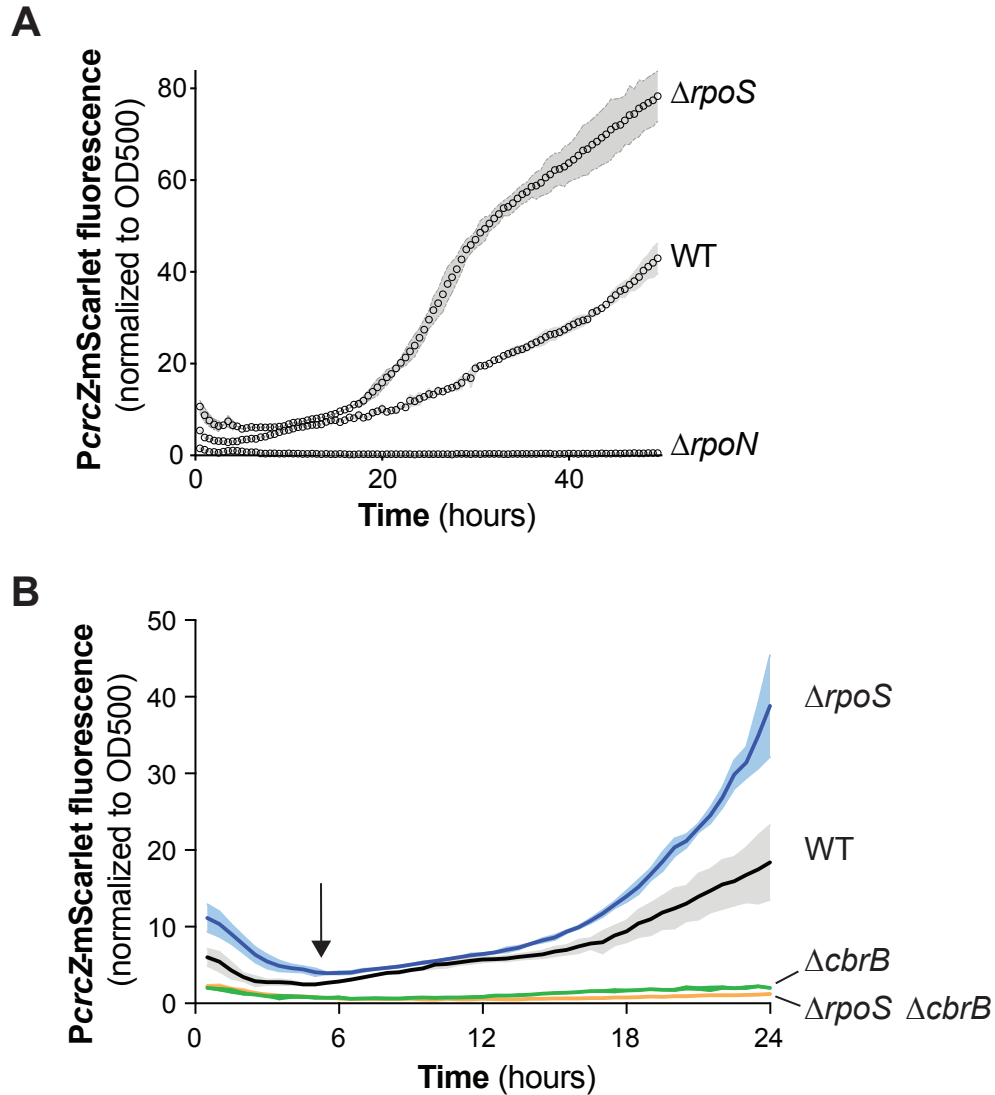

**Figure S2. Deletion of *cbrB* abrogates *crcZ* expression in the  $\Delta rpoS$  background. (A)** PA14,  $\Delta rpoS$ ,  $\Delta rpoN$  strains with *PcrcZ-mScarlet* were grown in 1% tryptone broth with shaking for 24 hours. **(B)** PA14,  $\Delta rpoS$ ,  $\Delta cbrB$ , and  $\Delta rpoS\Delta cbrB$  strains were grown in 1% tryptone broth with shaking for 24 hours. The arrow indicates the onset of stationary phase. Traces represent the averages of biological triplicates and shading indicates standard deviation.

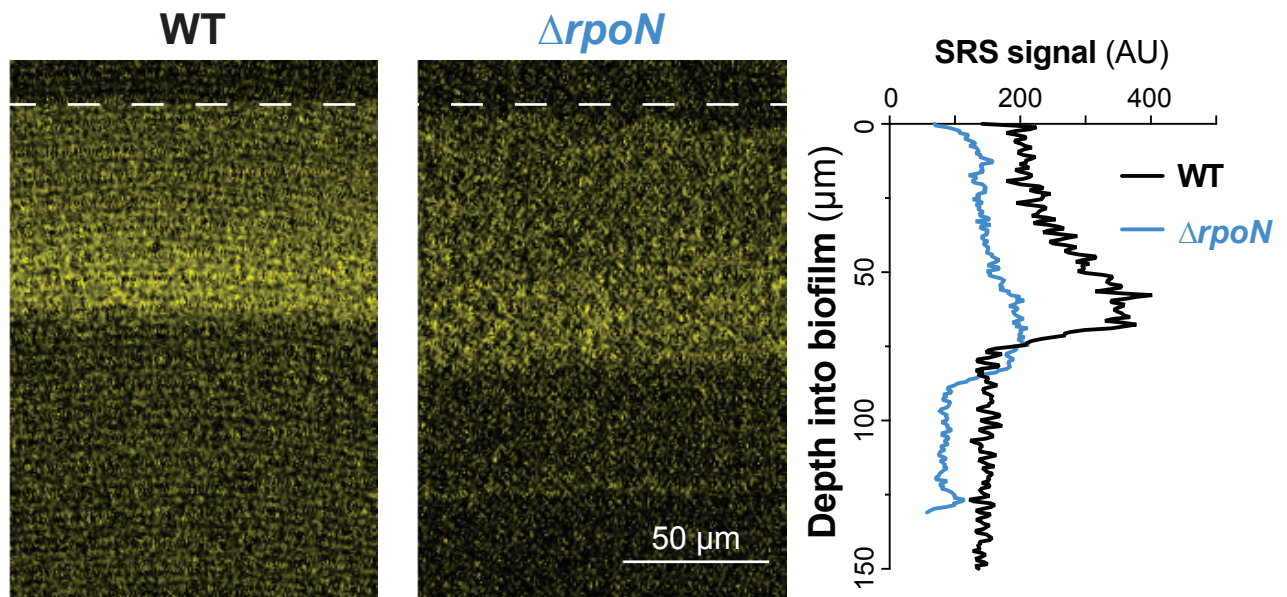

**Figure S3. The effect of RpoN on biofilm metabolic activity is consistent with its role in *crcZ* expression.** Left and center: SRS images of thin sections prepared from WT and  $\Delta rpoN$  biofilms. SRS signal is indicative of metabolic activity and is false-colored yellow. Right: Average SRS signal across depth. The experiment was performed in biological triplicate and representative images are shown.

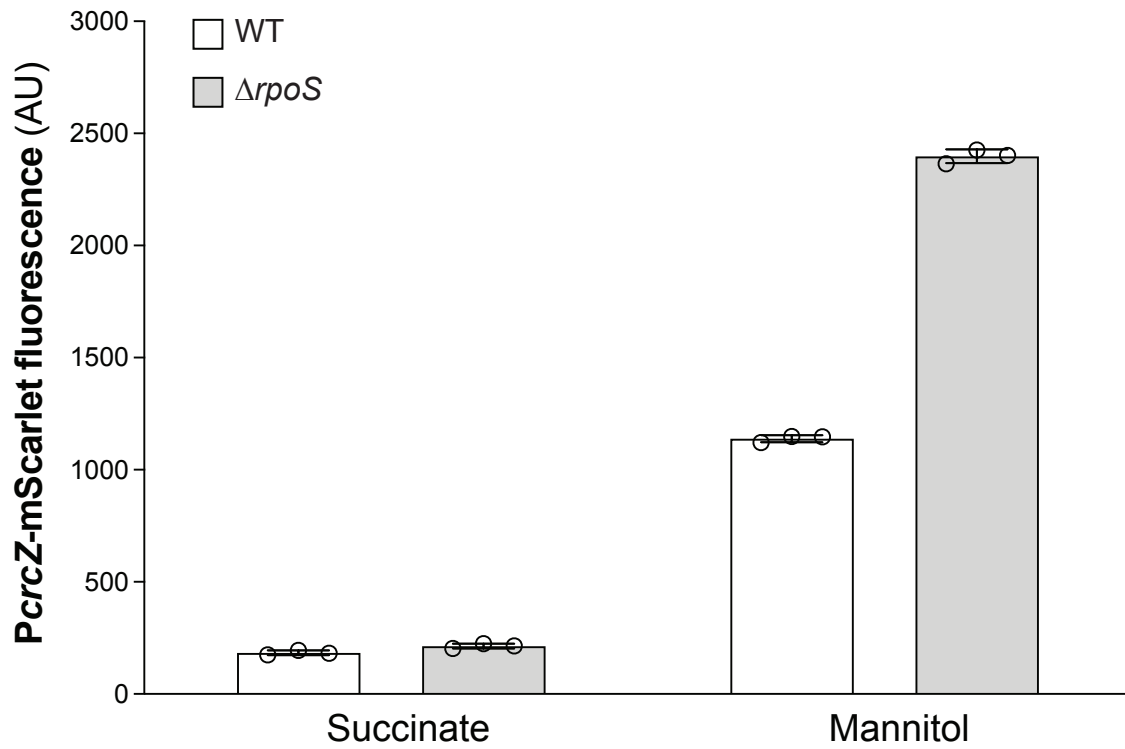

**Figure S4.** *rpoS* deletion enhances *crcZ* expression during liquid-culture growth on mannitol, a nonpreferred carbon source. The WT and  $\Delta rpoS$  *PcrcZ-mScarlet* reporter strains were grown in a defined medium to an OD (500 nm) of 0.3 with the indicated compounds as sole carbon sources. Individual points represent biological triplicates and error bars represent standard deviation.

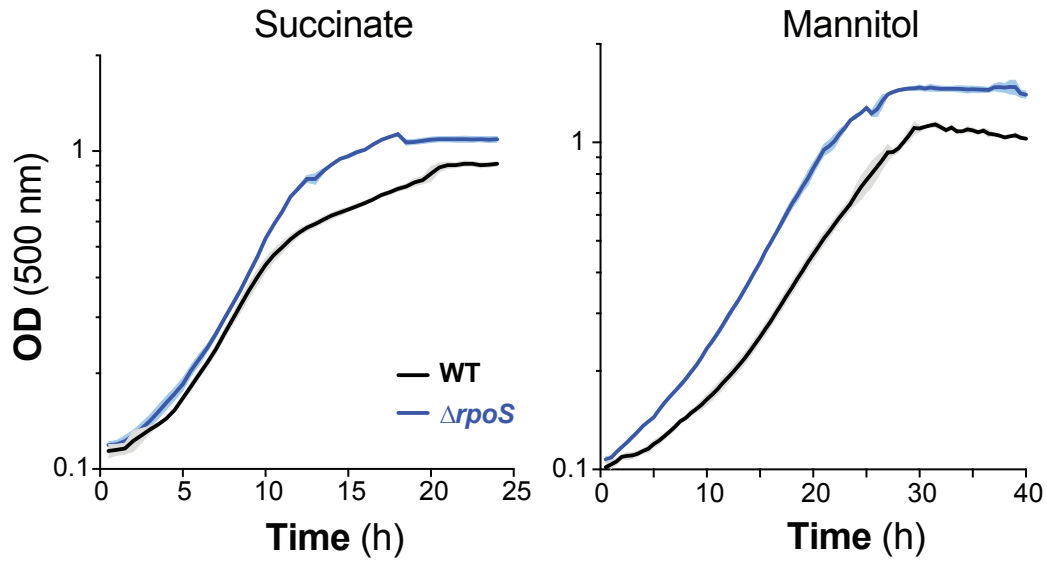

**Figure S5. Effects of *rpoS* and *crc* deletions on planktonic growth with individual carbon sources.** PA14 and  $\Delta rpoS$  were grown in a defined medium with 20 mM succinate or mannitol. Traces represent the averages of biological triplicates and shading indicates standard deviation. Mannitol cultures were grown for 40 hours to capture the complete growth cycle.

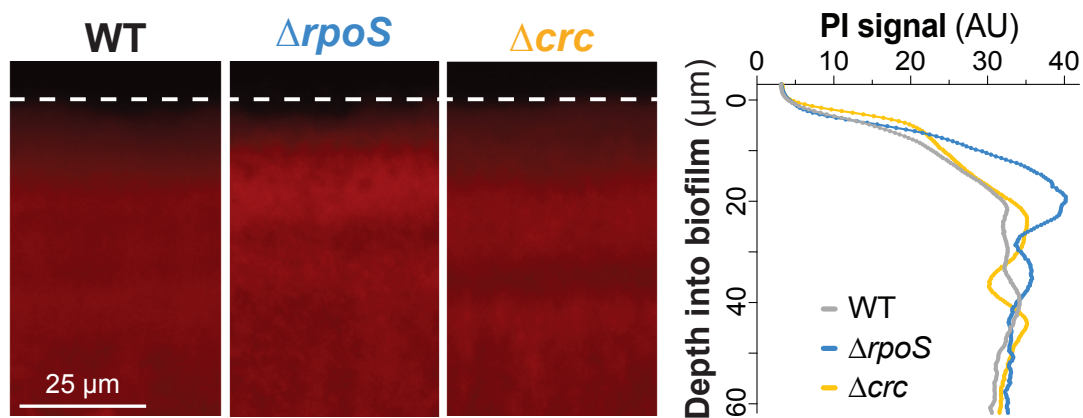

**Figure S6. Propidium iodide staining reveals increased death at the biofilm-air interface  $\Delta rpoS$  biofilms.** Fluorescence images of thin sections prepared from WT,  $\Delta rpoS$ , and  $\Delta crc$  biofilms. Biofilms were grown on 1% tryptone, 1% agar for 72 hours then transferred to equivalent medium containing 50  $\mu M$  propidium iodide for 6 hours. Right: Average propidium iodide signal across depth. The experiment was performed in biological triplicate and representative images are shown.

**Table S1. Bacterial strains used in this study.**

| Number                                | Strain                                              | Description                                                                                                                            | Source     |
|---------------------------------------|-----------------------------------------------------|----------------------------------------------------------------------------------------------------------------------------------------|------------|
| <i>Pseudomonas aeruginosa</i> strains |                                                     |                                                                                                                                        |            |
| LD0                                   | UCBPP-PA14 (WT)                                     | Clinical isolate UCBPP-PA14                                                                                                            | (1)        |
| LD24                                  | $\Delta phz$ (also referred to as $\Delta phz1/2$ ) | PA14 with the <i>phzA1-G1</i> (PA14_09480-PA14_09410) and <i>phzA2-G2</i> (PA14_39970-PA14_39880) operons deleted                      | (2)        |
| LD3692                                | $\Delta phzH$                                       | PA14 with <i>phzH</i> (PA14_00640) deleted                                                                                             | (3)        |
| LD3739                                | $\Delta phzMS$                                      | PA14 with <i>phzM</i> (PA14_09490) and <i>phzS</i> (PA14_09400) deleted                                                                | (3)        |
| LD3746                                | $\Delta phzHMS$                                     | PA14 with <i>phzH</i> (PA14_00640), <i>phzM</i> (PA14_09490), and <i>phzS</i> (PA14_09400) deleted                                     | (4)        |
| LD851                                 | $\Delta phzHS$                                      | PA14 with <i>phzH</i> (PA14_00640) and <i>phzS</i> (PA14_094400) deleted                                                               | (3)        |
| LD64                                  | BigBlue ( <i>phzM+</i> )                            | DKN370; PA14 merodiploid strain containing an extra copy of <i>phzM</i> (PA14_09490)                                                   | (5)        |
| LD3192                                | $\Delta rpoS$                                       | PA14 with <i>rpoS</i> (PA14_17480) deleted                                                                                             | This study |
| LD3193                                | $\Delta rpoS\Delta phz$                             | PA14 with <i>rpoS</i> (PA14_17480) and the <i>phz1</i> (PA14_09480-PA14_09410) and <i>phz2</i> (PA14_39970-PA14_39880) operons deleted | This study |
| LD3469                                | $\Delta rpoS\Delta phzHMS$                          | PA14 with <i>rpoS</i> (PA14_17480), <i>phzH</i> (PA14_00640), <i>phzM</i> (PA14_09490), and <i>phzS</i> (PA14_09400) deleted           | This study |
| LD3674                                | $\Delta crc$                                        | PA14 with <i>crc</i> (PA14_70390) deleted                                                                                              | This study |
| LD3675                                | $\Delta crc\Delta phz$                              | PA14 with <i>crc</i> (PA14_70390) and the <i>phz1</i> (PA14_09480-PA14_09410) and <i>phz2</i> (PA14_39970-PA14_39880) operons deleted  | This study |
| LD3717                                | $\Delta rpoS\Delta crc$                             | PA14 with <i>rpoS</i> (PA14_17480) and <i>crc</i> (PA14_70390) deleted                                                                 | This study |
| LD3190                                | $\Delta rpoN$                                       | PA14 with <i>rpoN</i> (PA14_57940) deleted                                                                                             | This study |

|                        |                                                           |                                                                                                                                                                                                                                                                                             |            |
|------------------------|-----------------------------------------------------------|---------------------------------------------------------------------------------------------------------------------------------------------------------------------------------------------------------------------------------------------------------------------------------------------|------------|
| LD4497                 | $\Delta cbrB$                                             | PA14 with <i>cbrB</i> (PA14_62540) deleted                                                                                                                                                                                                                                                  | This study |
| LD4500                 | $\Delta rpoS \Delta cbrB$                                 | PA14 with <i>rpoS</i> (PA14_17480) and <i>cbrB</i> (PA14_62540) deleted                                                                                                                                                                                                                     | This study |
| LD5068                 | PA14<br>attTn7::PPA1/04/03-PhzH                           | PA14 containing a construct in the attTn7 site that expresses the coding region of PhzH under control of the lac-derived constitutive PA1/04/03 promoter.                                                                                                                                   | This study |
| LD3870                 | PA14 attB::P <i>crc-mScarlet</i>                          | PA14 containing a construct in the <i>attB</i> site that expresses <i>mScarlet</i> under control of the 500bp region upstream of <i>crc</i> (PA14_17480)                                                                                                                                    | This study |
| LD4082                 | PA14<br>attB::P <i>crcZ-mScarlet</i>                      | PA14 containing a construct in the <i>attB</i> site that expresses <i>mScarlet</i> under control of the 350bp region upstream of <i>crcZ</i> (Unannotated between PA14_62540 and PA14_62560. Annotated as PA4726.11 in PAO1)                                                                | This study |
| LD3941                 | $\Delta rpoS$<br>attB::P <i>crc-mScarlet</i>              | $\Delta rpoS$ (PA14_17480) containing a construct in the <i>attB</i> site that expresses <i>mScarlet</i> under control of the 500bp region upstream of <i>crc</i> (PA14_17480)                                                                                                              | This study |
| LD4108                 | $\Delta rpoS$<br>attB::P <i>crcZ-mScarlet</i>             | $\Delta rpoS$ (PA14_17480) containing a construct in the <i>attB</i> site that expresses <i>mScarlet</i> under control of the 350bp region upstream of <i>crcZ</i> (Annotated as PA4726.11 in PAO1)                                                                                         | This study |
| LD4498                 | $\Delta cbrB$<br>attB::P <i>crcZ-mScarlet</i>             | PA14 attB::P <i>crcZ-mScarlet</i> , with <i>cbrB</i> (PA14_62540) deleted                                                                                                                                                                                                                   | This study |
| LD4501                 | $\Delta rpoS \Delta cbrB$<br>attB::P <i>crcZ-mScarlet</i> | PA14 attB::P <i>crcZ-mScarlet</i> , with <i>cbrB</i> (PA14_62540) and <i>rpoS</i> (PA14_17480) deleted                                                                                                                                                                                      | This study |
| LD4229                 | $\Delta rpoN$<br>attB::P <i>crcZ-mScarlet</i>             | PA14 attB::P <i>crcZ-mScarlet</i> , with <i>rpoN</i> (PA14_57940) deleted                                                                                                                                                                                                                   | This study |
| <i>E. coli</i> strains |                                                           |                                                                                                                                                                                                                                                                                             |            |
| LD44                   | UQ950                                                     | <i>E. coli</i> DH5 $\alpha$ $\lambda$ (pir) host for cloning; F- $\Delta$ ( <i>argF-lac</i> )169 $\Phi$ 80 <i>dlacZ58</i> ( $\Delta$ M15) <i>glnV44</i> (AS) <i>rfdD1</i> <i>gyrA96</i> (NalR) <i>recA1</i> <i>endA1</i> <i>spoT1</i> <i>thi-1</i> <i>hsdR17</i> <i>deoR</i> $\lambda$ pir+ | D. Lies    |
| LD661                  | BW29427                                                   | Donor strain for conjugation: <i>thrB1004</i>                                                                                                                                                                                                                                               | W. Metcalf |



|                                         |        |                                                                                                                                                                     |            |
|-----------------------------------------|--------|---------------------------------------------------------------------------------------------------------------------------------------------------------------------|------------|
|                                         |        | <i>pro thi rpsL hsdS lacZ</i> ΔM15RP4–1360<br>Δ( <i>araBAD</i> )567 Δ <i>dapA</i> 1341::[ <i>erm pir</i> (wt)]                                                      |            |
| LD2901                                  | S17-1  | Donor strain for conjugation: Str <sup>R</sup> , T <sub>p</sub> <sup>R</sup> , F <sup>-</sup><br>RP4-2-Tc::Mu <i>aphA</i> ::Tn7 <i>recA</i> λ <i>pir</i><br>lysogen | R. Simon   |
| <i>Saccharomyces cerevisiae</i> strains |        |                                                                                                                                                                     |            |
| LD676                                   | InvSc1 | <i>MATα/MATα leu2/leu2 trp1-289/trp1-289</i><br><i>ura3-52/ura3-52 his3-Δ1/his3-Δ1</i>                                                                              | Invitrogen |

**Table S2. Plasmids used in this study.**

| Plasmid Name | Description                                                                                                                                                                                                   | Source     |
|--------------|---------------------------------------------------------------------------------------------------------------------------------------------------------------------------------------------------------------|------------|
| pMQ30        | Yeast-based allelic-exchange vector; <i>sacB</i> <sup>+</sup> , CEN/ARSH, URA3 <sup>+</sup> , Gm <sup>R</sup> .                                                                                               | (6)        |
| pFLP2        | Site-specific excision vector with cl857-controlled FLP recombinase. encoding sequence, <i>sacB</i> <sup>+</sup> , Amp <sup>R</sup> . Used to insert LD3208-based plasmids into <i>P. aeruginosa</i> strains. | (7)        |
| pLD3208      | Gm <sup>R</sup> , Tet <sup>R</sup> flanked by Flp recombinase target (FRT) sites to resolve out resistance cassettes.                                                                                         | (8)        |
| pAKN69       | GmR, CmR mini-Tn7 PPA1/04/03::yfp                                                                                                                                                                             | (9)        |
| pLD3471      | Δ <i>rpoS</i> ( <i>PA14_17480</i> ) PCR fragment introduced into pMQ30 by gap repair cloning in yeast strain InvSc1.                                                                                          | This study |
| pLD3473      | Δ <i>rpoN</i> ( <i>PA14_57940</i> ) PCR fragment introduced into pMQ30 by gap repair cloning in yeast strain InvSc1.                                                                                          | This study |
| pLD3673      | Δ <i>crc</i> ( <i>PA14_70390</i> ) PCR fragment introduced into pMQ30 by gap repair cloning in yeast strain InvSc1.                                                                                           | This study |
| pLD5056      | Δ <i>cbrB</i> ( <i>PA14_62540</i> ) PCR fragment introduced into pMQ30 by gap repair cloning in yeast strain InvSc1.                                                                                          | This study |
| pLD5065      | The CDS of PhzH ( <i>PA14_00640</i> ) with lambda t0 terminator PCR fragment ligated into pAKN69 using NheI and SphI.                                                                                         | This study |
| pLD3869      | 500 bp upstream of <i>crc</i> ( <i>PA14_70390</i> ) PCR fragment ligated into pLD3208 using SpeI and XhoI.                                                                                                    | This study |
| pLD4645      | 350 bp upstream of <i>crcZ</i> (annotated as <i>PA4726.11</i> in PAO1) PCR fragment ligated into pLD3208 using SpeI and XhoI.                                                                                 | This study |

**Table S3. Primers used in this study.**

| Primer Number                                             | Sequence                                                     |
|-----------------------------------------------------------|--------------------------------------------------------------|
| Primers for plasmid pLD3471 (used to make $\Delta rpoS$ ) |                                                              |
| LD2560                                                    | ggaattgtgagcggataacaatttcacacaggaacagct TGGATAAGGGGGAAGGATTG |
| LD2561                                                    | CCGTTCTTCTCCAGGATCTC CGGCCCTTCTTTTTTGAGTGC                   |
| LD2562                                                    | GCACTCAAAAAGAAGGGCCG GAGATCCTGGAGAAGAACGG                    |
| LD2563                                                    | aggcaaattctgtttatcagaccgcttctgcttctgat AAACCACCAGCCTGCCGCAC  |
| Primers for plasmid pLD3473 (used to make $\Delta rpoN$ ) |                                                              |
| LD2568                                                    | ggaattgtgagcggataacaatttcacacaggaacagct CGCGCCCGCGCATCGACATG |
| LD2569                                                    | CACCAGTCGCTTGCGCTC CATCTTGAGGACTAGCGATGG                     |
| LD2570                                                    | CCATCGCTAGTCCTCAAGATG GAGCGCAAGCGACTGGTG                     |
| LD2571                                                    | aggcaaattctgtttatcagaccgcttctgcttctgat CAGGGCGCGCTGCGCCAGGT  |
| Primers for plasmid pLD3673 (used to make $\Delta crc$ )  |                                                              |
| LD3184                                                    | ggaattgtgagcggataacaatttcacacaggaacagct GCCCTTGTCGTTGACGTAGC |
| LD3185                                                    | TCGACGATCAGCGGCGCATGC CCGCAGCCTGAATACCATTAC                  |
| LD3186                                                    | GTGAATGGTATTCAGGCTGCG GCATGCGCCGCTGATCGTCGA                  |
| LD3197                                                    | aggcaaattctgtttatcagaccgcttctgcttctgatTCGGCGAGAACACCCTGTAC   |
| Primers for plasmid pLD5056 (used to make $\Delta cbrB$ ) |                                                              |
| LD4030                                                    | ggaattgtgagcggataacaatttcacacaggaacagct CTGGTGCTACTGGTGAAG   |
| LD4031                                                    | GAAAGGTCCTCGGTGGGCTC GGTTTCGTCTTCGACGATCA                    |
| LD4032                                                    | TGATCGTCGAAGACGAAACC GAGCCCACCGAGGACCTTTC                    |
| LD4033                                                    | aggcaaattctgtttatcagaccgcttctgcttctgat GTCTGCGCGGATTCTAGCAT  |
| Primers for plasmid pLD5065 (used to make PhzH+)          |                                                              |

|                                                                   |                                                  |
|-------------------------------------------------------------------|--------------------------------------------------|
| LD4528                                                            | gattcgactgc gcatgctgTGCGGTCTCGCGGG               |
| LD4529                                                            | actggatctatcaacaggagtccaaTCAGGCGGAGAGCCC         |
| LD4530                                                            | CAGGTTGTACGGGCTCTCCGCCTGAttggactcctgtgatagatccag |
| LD4077                                                            | acgtacgtacgctagcTTGGATTCTCACCAATAAAAAACGCC       |
| Primers for plasmid pLD3869 (used to make <i>Pcrc-mScarlet</i> )  |                                                  |
| LD3273                                                            | tcccgacgggcccgtaccaGATGATCTGCATCACTTCG           |
| LD3274                                                            | tcttaaactagactcgaggAAATGGCCCCAAAATCAC            |
| Primers for plasmid pLD4645 (used to make <i>PcrcZ-mScarlet</i> ) |                                                  |
| LD3663                                                            | acgtacactagtCACCCCTGCAACCTGTTACC                 |
| LD3272                                                            | tcttaaactagactcgaggCAATACATAAGCAGATGCCGTGCC      |

### Supplementary references

1. L. G. Rahme, *et al.*, Common virulence factors for bacterial pathogenicity in plants and animals. *Science* **268**, 1899–1902 (1995).
2. L. E. P. Dietrich, A. Price-Whelan, A. Petersen, M. Whiteley, D. K. Newman, The phenazine pyocyanin is a terminal signalling factor in the quorum sensing network of *Pseudomonas aeruginosa*. *Mol. Microbiol.* **61**, 1308–1321 (2006).
3. D. L. Bellin, *et al.*, Integrated circuit-based electrochemical sensor for spatially resolved detection of redox-active metabolites in biofilms. *Nat. Commun.* **5**, 3256 (2014).
4. D. A. Recinos, *et al.*, Redundant phenazine operons in *Pseudomonas aeruginosa* exhibit environment-dependent expression and differential roles in pathogenicity. *Proc. Natl. Acad. Sci. U. S. A.* **109**, 19420–19425 (2012).
5. A. Price-Whelan, L. E. P. Dietrich, D. K. Newman, Pyocyanin alters redox homeostasis and carbon flux through central metabolic pathways in *Pseudomonas aeruginosa* PA14. *J. Bacteriol.* **189**, 6372–6381 (2007).
6. R. M. Q. Shanks, N. C. Caiazza, S. M. Hinsa, C. M. Toutain, G. A. O’Toole, *Saccharomyces cerevisiae*-based molecular tool kit for manipulation of genes from gram-negative bacteria. *Appl. Environ. Microbiol.* **72**, 5027–5036 (2006).
7. T. T. Hoang, R. R. Karkhoff-Schweizer, A. J. Kutchma, H. P. Schweizer, A broad-host-range Flp-FRT recombination system for site-specific excision of chromosomally-located DNA sequences: application for isolation of unmarked *Pseudomonas aeruginosa* mutants. *Gene* **212**, 77–86 (1998).
8. B. Wang, *et al.*, *Pseudomonas aeruginosa* PA14 produces R-bodies, extendable protein

polymers with roles in host colonization and virulence. *Nat. Commun.* **12**, 4613 (2021).

9. L. Lambertsen, C. Sternberg, S. Molin, Mini-Tn7 transposons for site-specific tagging of bacteria with fluorescent proteins. *Environ. Microbiol.* **6**, 726–732 (2004).
